# Supplementary material
Source: PubMed Central journal article supplement (PMC3325026)
Supplement: NIHMS367444-supplement-01.pdf [file NIHMS367444-supplement-01.pdf]

## SUPPLEMENTAL LEGENDS

### Supplemental Figure 1. $\alpha$ P2-Cre Expression and Weights of Tissues in Control and A-BCA Mutant Mice

(A, B) X-gal staining (blue) of control (*rosa26-flox-stop-flox-LacZ*; R26R) or  $\alpha$ P2-Cre; R26R (A) whole tissues and (B) subcutaneous adipose stromal vascular fraction (SVF). SVF counterstained with nuclear fast red. Note lack of X-gal staining in the SVF of  $\alpha$ P2-Cre; R26R mice. IWAT = inguinal white adipose tissue (WAT), GWAT = perigonadal WAT, MWAT = mesenteric WAT.

(C) Kidney and heart weights of control (mixture of  $\alpha$ P2-Cre and fBC mice) and A-BCA ( $\alpha$ P2-Cre; fBC) siblings.  $n \geq 8$  per cohort,  $n \geq 3$  cohorts.

Error bars indicate standard error of the mean (SEM). Statistical significance assessed by two-tailed Student's t-test.

### Supplemental Figure 2. Cre Expression in PPAR $\gamma$ -tTA System and Weights of Tissues in Control and P-BCA Mutant Mice

(A, B) X-gal staining (blue) of control (PPAR $\gamma$ -tTA; R26R) and PPAR $\gamma$ -tTA; TRE-Cre; R26R in (A) whole tissues and (B) subcutaneous adipose stromal vascular fraction (SVF). SVF counterstained with nuclear fast red. Note presence of X-gal staining (blue) in the SVF of PPAR $\gamma$ -tTA; TRE-Cre; R26R mice. IWAT = inguinal white adipose tissue (WAT), GWAT = perigonadal WAT, MWAT = mesenteric WAT.

(C) Comparison of Cre mRNA levels in adipocyte and stromal vascular (SV) cells of PPAR $\gamma$ -tTA; TRE-Cre mice.

(D) Comparison of Cre mRNA levels in  $\alpha$ P2-Cre and PPAR $\gamma$ -tTA; TRE-Cre adipocytes.

(E) Kidney and heart weights of control (mixture of PPAR $\gamma$ -tTA; TRE-Cre and PPAR $\gamma$ -tTA; fBC) and P-BCA (PAR $\gamma$ -tTA; TRE-Cre; fBC) siblings.  $n \geq 8$  per cohort,  $n \geq 3$  cohorts  
Error bars indicate SEM. Statistical significance assessed by two-tailed Student's t-test,  
\* $p < 0.05$

**Supplemental Figure 3. Fibrotic and Genetic Changes as well as Lineage Tracing of BAT, Skin and Perigonadal Adipose Tissue of Control and P-BCA Mutant Mice**

(A) Hematoxylin and eosin (H&E) stained histological sections of control and P-BCA brown adipose tissue (BAT).

(B) Trichrome stained histological sections of control and P-BCA skin.

(C) qCR of perigonadal adipose depots (PGW) of control and P-BCA siblings of the indicated adipogenic (PPAR $\gamma$ ), fibroblast (Col-6a1, DDR2) and Wnt target (Wisp2) markers.  $n \geq 6$ , repeated  $\geq 3$  cohorts

(D) Histological sections of X-gal stained P-BCA BAT and skin. Red arrows indicate lineage positive cells.

Error bars indicate SEM. Statistical significance assessed by two-tailed Student's t-test.  
\*\* $p < 0.01$

Genotypes: control = PPAR $\gamma$ -tTA; TRE-Cre, and PPAR $\gamma$ -tTA; fBC. P-BCA = PPAR $\gamma$ -tTA; TRE-Cre; fBC. For D, P-BCA = PPAR $\gamma$ -tTA; TRE-Cre; fBC; R26R.

**Supplemental Figure 4. Oxygen Consumption and Respiratory Quotient of Control and P-BCA Mice**

(A, B) Oxygen consumption ( $VO_2$ ) and respiratory quotient (RQ) of control (PPAR $\gamma$ -tTA; TRE-Cre and PPAR $\gamma$ -tTA; fBC) and P-BCA (PPAR $\gamma$ -tTA; TRE-Cre; fBC) siblings during dark and light cycles.

Error bars indicate SEM. Statistical significance assessed by two-tailed Student's t-test. \* $p < 0.05$

### **Supplemental Figure 5. Insulin Levels at End of Euglycemic Clamp**

Serum insulin levels were quantified after two hours of insulin and glucose infusion in control (PPAR $\gamma$ -tTA; TRE-Cre and PPAR $\gamma$ -tTA; fBC) and P-BCA (PPAR $\gamma$ -tTA; TRE-Cre; fBC) siblings.  $n \geq 8$  per cohort, repeated  $\geq 3$  cohorts

Error bars indicate SEM. Statistical significance was assessed by two-tailed Student's t-test.

Supplemental Information

Supplemental Figure 1

A

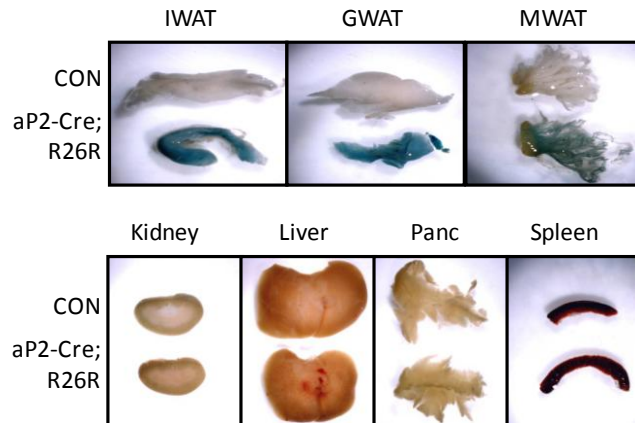

B

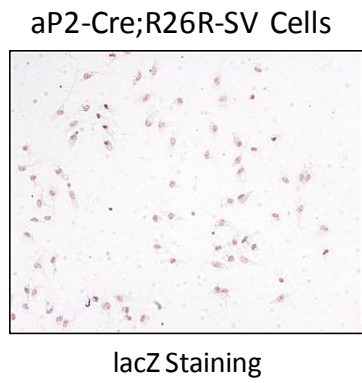

C

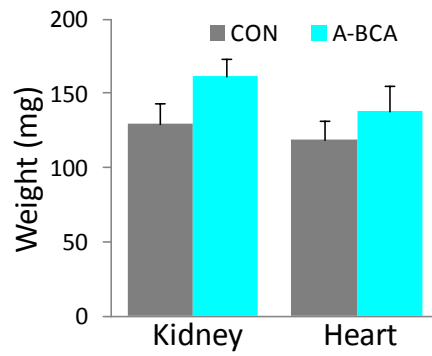

## Supplemental Figure 2

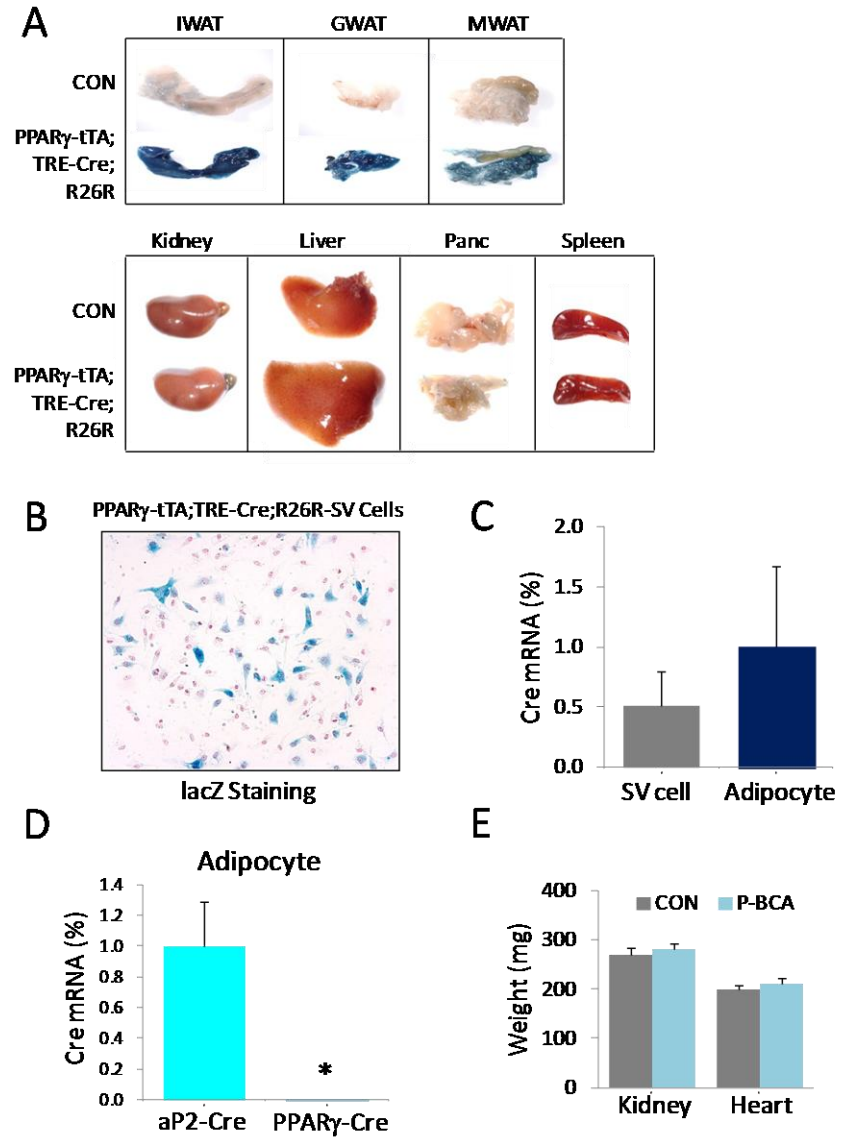

# Supplemental Figure 3

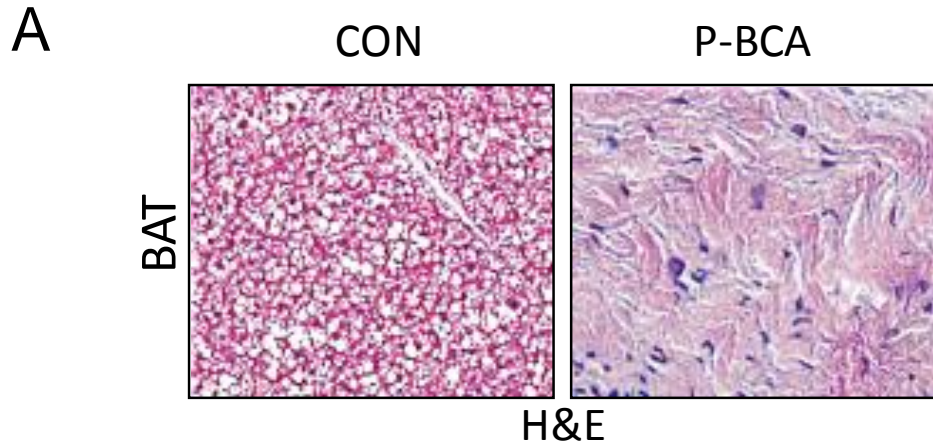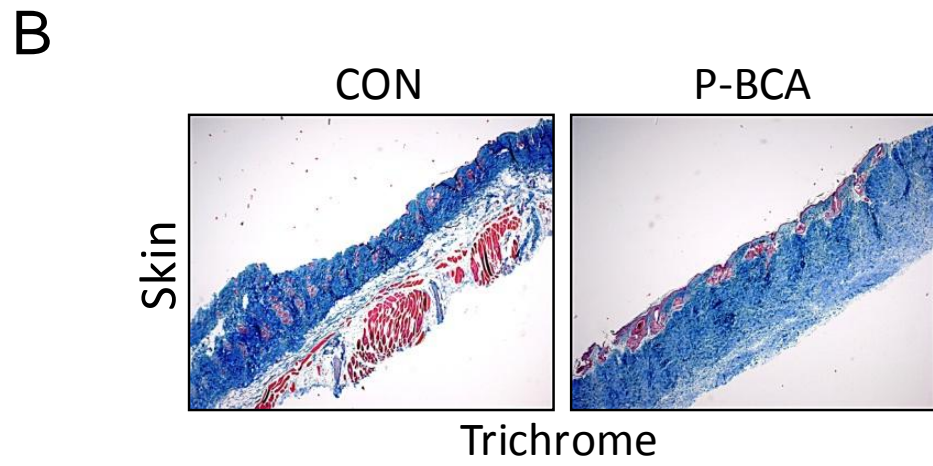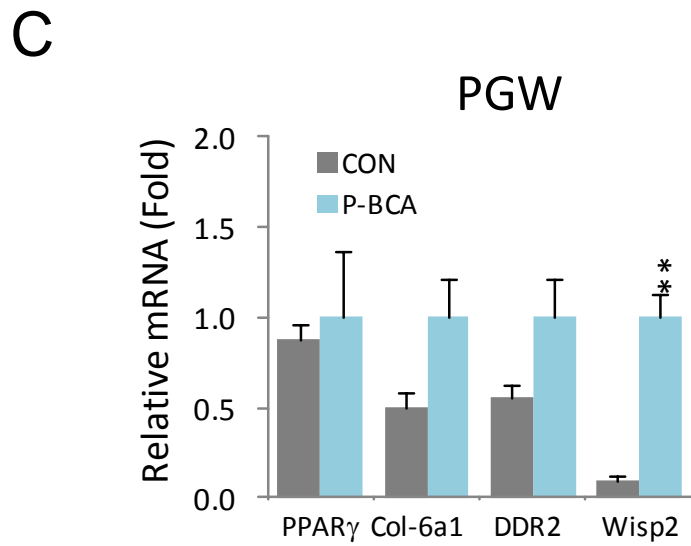

# Supplement Figure 4

A

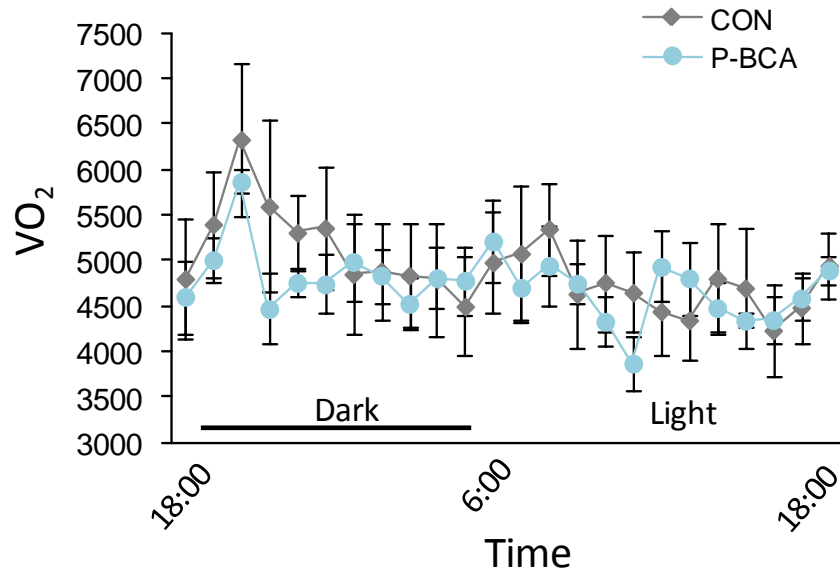

B

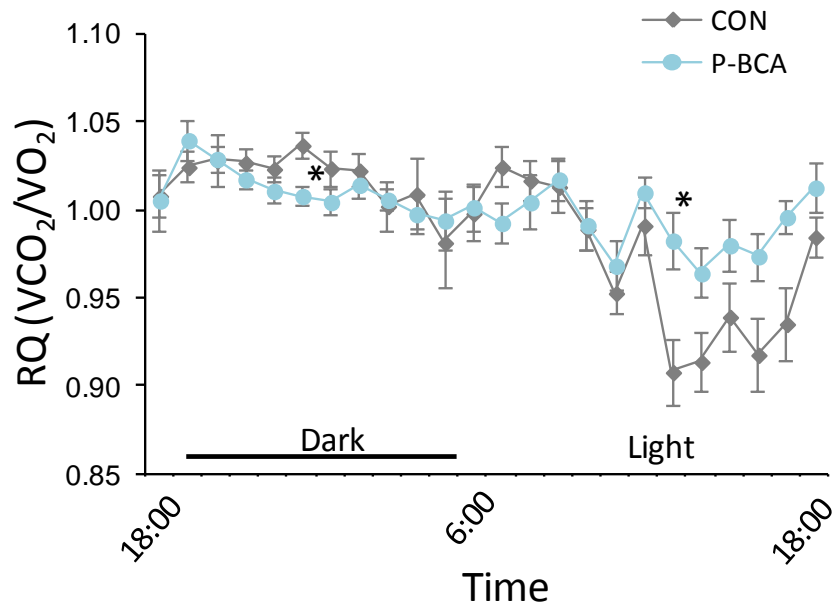

Supplemental Figure 5

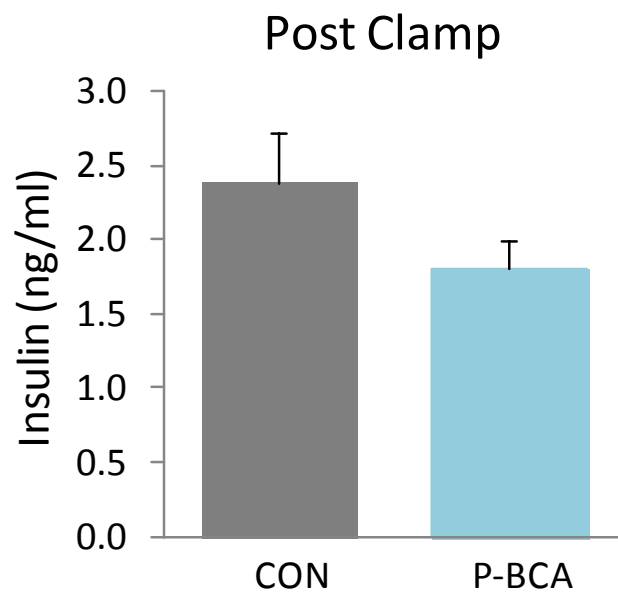



## **SUPPLEMENTAL LEGENDS**

### **Supplemental Figure 1. $\alpha$ P2-Cre Expression and Weights of Tissues in Control and A-BCA Mutant Mice**

(A, B) X-gal staining (blue) of control (*rosa26-flox-stop-flox-LacZ*; R26R) or  $\alpha$ P2-Cre; R26R (A) whole tissues and (B) subcutaneous adipose stromal vascular fraction (SVF). SVF counterstained with nuclear fast red. Note lack of X-gal staining in the SVF of  $\alpha$ P2-Cre; R26R mice. IWAT = inguinal white adipose tissue (WAT), GWAT = perigonadal WAT, MWAT = mesenteric WAT.

(C) Kidney and heart weights of control (mixture of  $\alpha$ P2-Cre and fBC mice) and A-BCA ( $\alpha$ P2-Cre; fBC) siblings.  $n \geq 8$  per cohort,  $n \geq 3$  cohorts.

Error bars indicate standard error of the mean (SEM). Statistical significance assessed by two-tailed Student's t-test.

### **Supplemental Figure 2. Cre Expression in PPAR $\gamma$ -tTA System and Weights of Tissues in Control and P-BCA Mutant Mice**

(A, B) X-gal staining (blue) of control (PPAR $\gamma$ -tTA; R26R) and PPAR $\gamma$ -tTA; TRE-Cre; R26R in (A) whole tissues and (B) subcutaneous adipose stromal vascular fraction (SVF). SVF counterstained with nuclear fast red. Note presence of X-gal staining (blue) in the SVF of PPAR $\gamma$ -tTA; TRE-Cre; R26R mice. IWAT = inguinal white adipose tissue (WAT), GWAT = perigonadal WAT, MWAT = mesenteric WAT.

(C) Comparison of Cre mRNA levels in adipocyte and stromal vascular (SV) cells of PPAR $\gamma$ -tTA; TRE-Cre mice.

(D) Comparison of Cre mRNA levels in  $\alpha$ P2-Cre and PPAR $\gamma$ -tTA; TRE-Cre adipocytes.

(E) Kidney and heart weights of control (mixture of PPAR $\gamma$ -tTA; TRE-Cre and PPAR $\gamma$ -tTA; fBC) and P-BCA (PAR $\gamma$ -tTA; TRE-Cre; fBC) siblings.  $n \geq 8$  per cohort,  $n \geq 3$  cohorts

Error bars indicate SEM. Statistical significance assessed by two-tailed Student's t-test,

\* $p < 0.05$

### **Supplemental Figure 3. Fibrotic and Genetic Changes as well as Lineage Tracing of BAT, Skin and Perigonadal Adipose Tissue of Control and P-BCA Mutant Mice**

(A) Hematoxylin and eosin (H&E) stained histological sections of control and P-BCA brown adipose tissue (BAT).

(B) Trichrome stained histological sections of control and P-BCA skin.

(C) qCR of perigonadal adipose depots (PGW) of control and P-BCA siblings of the indicated adipogenic (PPAR $\gamma$ ), fibroblast (Col-6a1, DDR2) and Wnt target (Wisp2) markers.  $n \geq 6$ , repeated  $\geq 3$  cohorts

(D) Histological sections of X-gal stained P-BCA BAT and skin. Red arrows indicate lineage positive cells.

Error bars indicate SEM. Statistical significance assessed by two-tailed Student's t-test.

\*\* $p < 0.01$

Genotypes: control = PPAR $\gamma$ -tTA; TRE-Cre, and PPAR $\gamma$ -tTA; fBC. P-BCA = PPAR $\gamma$ -tTA; TRE-Cre; fBC. For D, P-BCA = PPAR $\gamma$ -tTA; TRE-Cre; fBC; R26R.

### **Supplemental Figure 4. Oxygen Consumption and Respiratory Quotient of Control and P-BCA Mice**

(A, B) Oxygen consumption ( $VO_2$ ) and respiratory quotient (RQ) of control (PPAR $\gamma$ -tTA; TRE-Cre and PPAR $\gamma$ -tTA; fBC) and P-BCA (PPAR $\gamma$ -tTA; TRE-Cre; fBC) siblings during dark and light cycles.

Error bars indicate SEM. Statistical significance assessed by two-tailed Student's t-test. \* $p < 0.05$

### **Supplemental Figure 5. Insulin Levels at End of Euglycemic Clamp**

Serum insulin levels were quantified after two hours of insulin and glucose infusion in control (PPAR $\gamma$ -tTA; TRE-Cre and PPAR $\gamma$ -tTA; fBC) and P-BCA (PPAR $\gamma$ -tTA; TRE-Cre; fBC) siblings.  $n \geq 8$  per cohort, repeated  $\geq 3$  cohorts

Error bars indicate SEM. Statistical significance was assessed by two-tailed Student's t-test.
